# Supplementary material for: Correlating Bromelain's activity with its structure and active-site dynamics and the medium's physical properties in a hydrated deep eutectic solvent
Source: Royal Society of Chemistry journal article supplement (doi:10.1039/d1cp00046b), 2021-01-01
Supplement: d1cp00046b1.pdf [file d1cp00046b1.pdf]

## Electronic Supplementary Information

### Correlating Bromelain's Activity with its Structure, Active-site Dynamics and Media's Physical Properties in a Hydrated Deep Eutectic Solvent

Nilimesh Das, Tanmoy Khan, Navin Subba and Pratik Sen\*

Department of Chemistry, Indian Institute of Technology Kanpur, Kanpur – 208 016, UP, India

#### **Content:**

- Table S1.** Secondary structural parameters of untagged bromelain, CPM tagged bromelain and TMR tagged bromelain.
- Table S2.** Secondary structural parameters of native bromelain and back extracted bromelain from various DES composition.
- Figure S1.** Absorption spectra of (a) free CPM and CPM tagged to bromelain, (b) free TMR and TMR tagged to bromelain
- Figure S2.** (a) CD spectra of native and back extracted (from various DES composition) bromelain. (b) Secondary structural parameters of native bromelain and back extracted bromelain from various DES composition.
- Figure S3.** Fitting comparison of fluorescence autocorrelation traces of (a) CPM and CPM tagged to bromelain and (b) TMR and TMR tagged to bromelain.
- Figure S4.** Autocorrelations traces of CPM tagged to bromelain at different laser power
- Figure S5.** (a) Normalized fluorescence intensity autocorrelation curve for rhodamine-6G at some representative DES concentration. (b) Variation of viscosity with increasing DES concentration.

**Table S1.** Secondary structural parameters of untagged, CPM tagged and TMR tagged bromelain.

|                           | $\alpha$ -helicity | $\beta$ -sheet | $\beta$ -turn | Random Coil |
|---------------------------|--------------------|----------------|---------------|-------------|
| <b>Untagged Bromelain</b> | 20.1               | 22.4           | 18.0          | 39.5        |
| <b>CPM-Bromelain</b>      | 19.6               | 22.4           | 17.5          | 40.5        |
| <b>TMR-Bromelain</b>      | 20.0               | 22.3           | 18.0          | 39.7        |

**Table S2.** Secondary structural parameters of native bromelain and back extracted bromelain from various DES composition.

| DES Content % (v/v) | $\alpha$ -helicity | $\beta$ -sheet | $\beta$ -turn | Random Coil |
|---------------------|--------------------|----------------|---------------|-------------|
| <b>0</b>            | 20.5               | 23.4           | 17.6          | 38.5        |
| <b>10</b>           | 20.4               | 23.5           | 17.6          | 38.5        |
| <b>20</b>           | 20.4               | 23.4           | 17.8          | 38.4        |
| <b>30</b>           | 20.2               | 23.8           | 17.8          | 38.2        |
| <b>40</b>           | 20.0               | 24.0           | 17.7          | 38.3        |
| <b>50</b>           | 19.7               | 24.1           | 17.7          | 38.5        |
| <b>60</b>           | 19.1               | 24.3           | 17.8          | 38.8        |
| <b>70</b>           | 18.3               | 24.8           | 17.8          | 39.1        |
| <b>80</b>           | 16.1               | 26.4           | 17.8          | 39.7        |

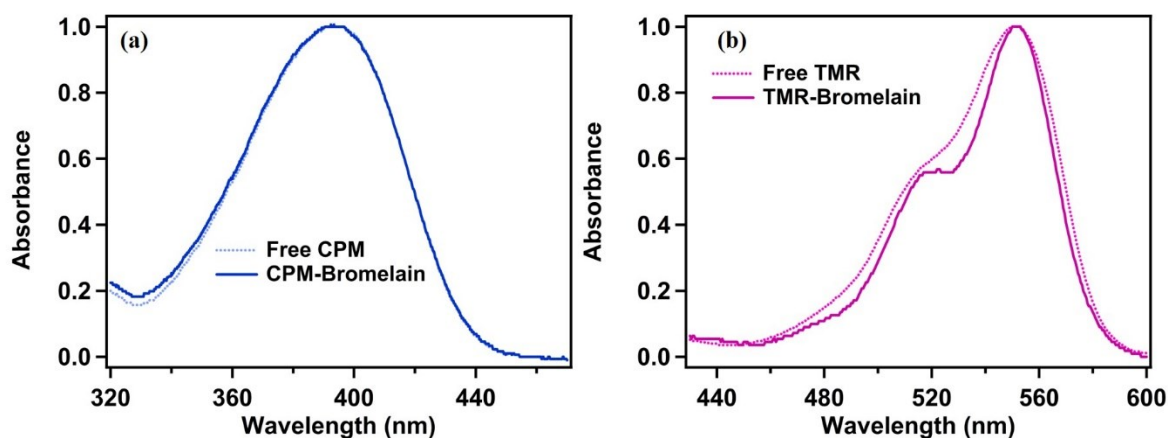

**Figure S1.** Absorption spectra of (a) free CPM and CPM tagged to bromelain; and (b) free TMR and TMR tagged to bromelain

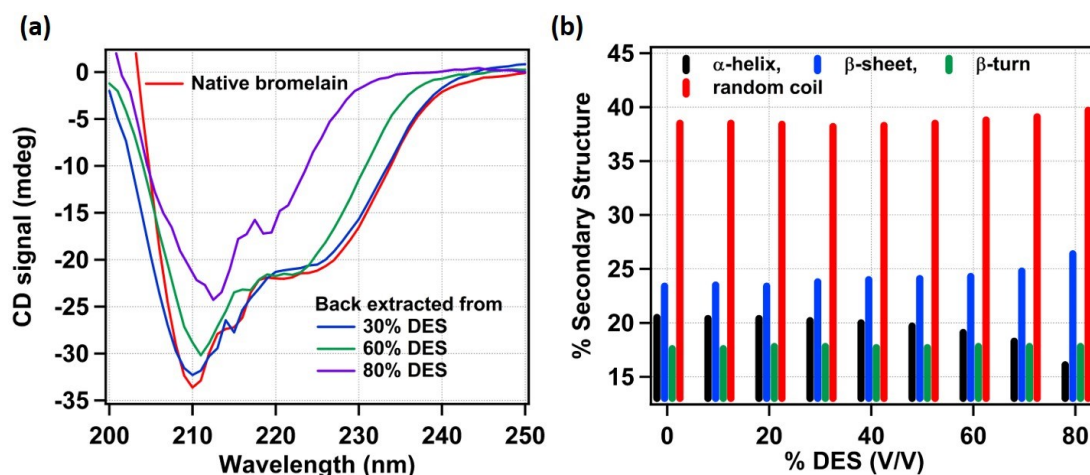

**Figure S2.** (a) CD spectra and (b) various secondary structural parameters of native bromelain in phosphate buffer (pH = 7.4) and back-extracted bromelain from various DES compositions. Bromelain concentration is 10  $\mu$ M and path length is 2 mm.

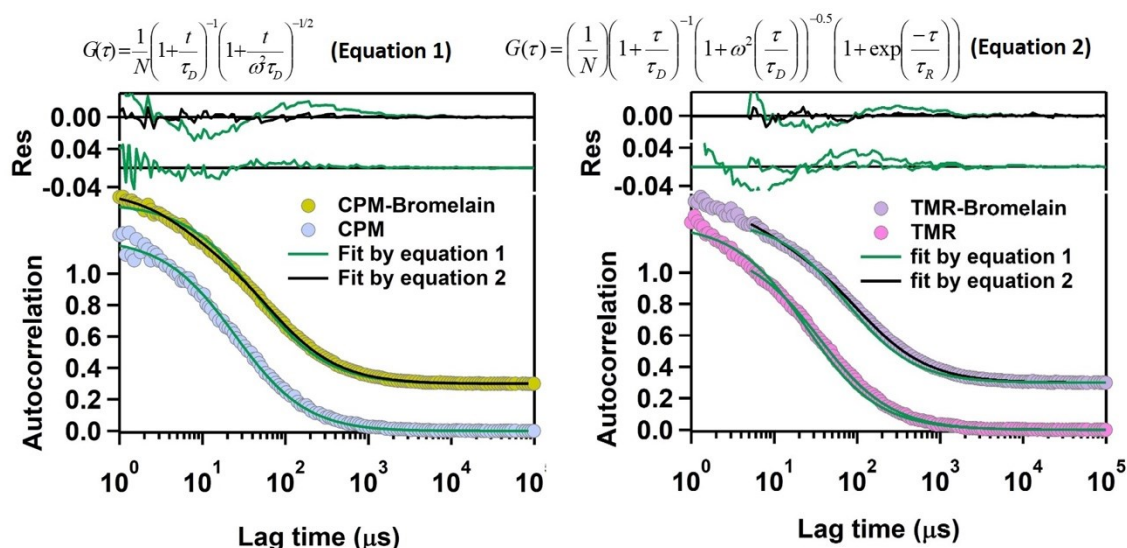

**Figure S3.** Fitting comparison of fluorescence autocorrelation traces of (a) CPM and CPM tagged to bromelain and (b) TMR and TMR tagged to bromelain. Equation 1 can fit the autocorrelation trace of CPM satisfactorily; but extra relaxation term is required to fit the autocorrelation trace of CPM-bromelain. Equation can fit the autocorrelation trace of TMR only when fitted from 5  $\mu$ s. However, to fit autocorrelation trace of TMR-bromelain from 5  $\mu$ s, equation 2 is required.

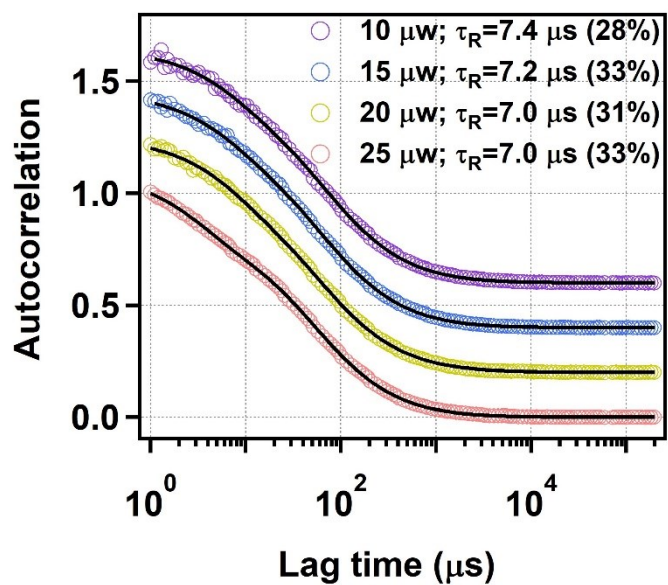

**Figure S4.** Autocorrelations traces of CPM tagged to bromelain at different laser power. The value of conformational fluctuation time and its contribution remains similar with the variation of power.

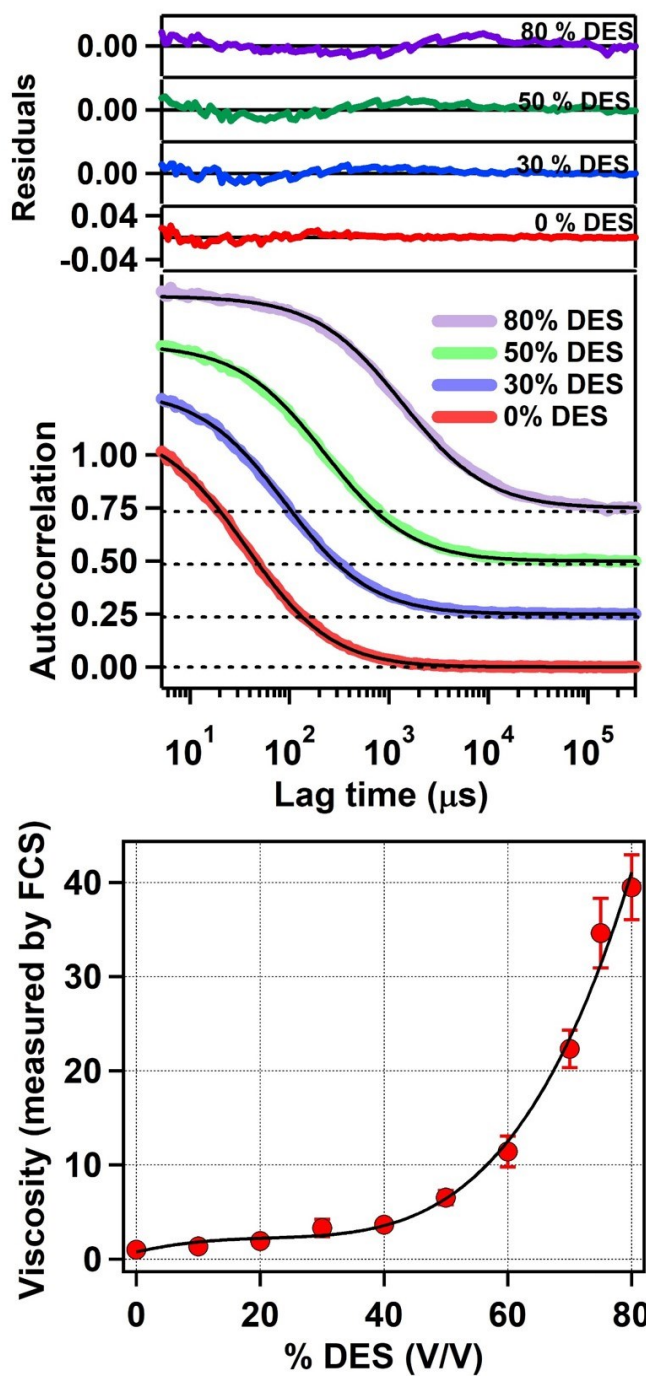

**Figure S5.** (a) Normalized fluorescence intensity autocorrelation curve for rhodamine-6G at some representative DES concentration. Fitting lines using equation 1 are shown by solid black lines. The residuals of fitting are also shown. (b) Variation of viscosity with increasing DES concentration
